# Supplementary material for: High-fidelity, efficient, and reversible labeling of endogenous proteins using CRISPR-based designer exon insertion
Source: eLife. 2021 Jun 8;10:e64911. doi: 10.7554/eLife.64911 (PMC8211447; doi:10.7554/eLife.64911)
Supplement: Figure 1—source data 1. [file elife-64911-fig1-data1.xlsx]

## Sheet: Fig1E
Labeling efficiency
0.33333
0.30769
0.27273
0.6
0.25
0.25
0.52174
0.41379

## Sheet: Fig1H
Time		CRISPIEd							untransfected
0		1	1	1	1	1	1		1	1	1	1	1	1
12		1.3333	1.5	1.6667	1.7143	1.5	1.8182		1.4773	1.5	1.6154	1.1892	1.4737	1.4211
24		2.1667	2.5556	2.4444	2.2857	2.4167	2.1818		2.2045	2.25	2.2692	1.8378	2.1053	1.9474
36		2.9167	3.0556	3.6667	3.1429	3.4167	3.6364		3.0455	3.75	3.4615	2.7838	3.2632	3.0789
48		4.1667	4	4.7778	4.4286	4.25	4.9091		3.5682	5.0714	4.4231	3.6757	4.4474	4.1316
60		5.4167	5.3333	6	7	5.75	6.6364		5	7	6.3462	5.4324	6.2632	6.0263
