# Supplementary material for: High-fidelity, efficient, and reversible labeling of endogenous proteins using CRISPR-based designer exon insertion
Source: eLife. 2021 Jun 8;10:e64911. doi: 10.7554/eLife.64911 (PMC8211447; doi:10.7554/eLife.64911)
Supplement: Figure 2—source data 1. [file elife-64911-fig2-data1.xlsx]

## Sheet: Fig2D
		Genomic Amplicon			mRNA Amplicon
		wildtype counts	INDEL counts		wildtype counts	INDEL counts
untransfected		54205	11		5761	10
transfected but no label		203	1386		4145	21
CRISPIEd cells	allele w/o insert	347	834		2930	6
	allele w/ forward insert, 5'	690	2077		3549	64
	allele w/ forward insert, 3'	4608	1428		5939	10
