# Supplementary material for: High-fidelity, efficient, and reversible labeling of endogenous proteins using CRISPR-based designer exon insertion
Source: eLife. 2021 Jun 8;10:e64911. doi: 10.7554/eLife.64911 (PMC8211447; doi:10.7554/eLife.64911)
Supplement: Figure 3—source data 1. [file elife-64911-fig3-data1.xlsx]

## Sheet: Fig3B
	i1	i2	i3	i4	i5
	0.18182	0.16667	0.5	0.52381	0.41667
	0.22222	0	0.2	0	0.5625
	0	0	0.13333	0.2	0.21739
	0	0	0.66667	0.24	0.11429
	0	0	0.1	0.29167	0
	0	0	0.0625	0.27778	0.076923
	0	0.19231	0.32258	0.3913	0.12
	0	0	0.0625	0.34483	0.22222
	0.25	0	0.27273	0.26667	0.33333
	0.081633	0.10714	0.14815	0.25455	0.058824
	0	0.027027	0.19643	0.21429	0.083333
	0	0	0.066667	0.29545	0.02
	0	0	0.34328	0.028169	0
	0.042553	0.037037	0.085106	0.16981	0.072727
	0.02	0.045455	0	0.046512	0.2
	0	0	0.25641	0.12	0.064103
	0	0	0.095238	0.17857	0.27778
	0	0	0.018519	0.16	0.05

## Sheet: Fig3C
	i4	e1	e2
	0.45455	0.15789	0
	0.70588	0	0.57143
	0.70588	0.088235	0
	0.42857	0.34783	0.30556
	0.33333	0.083333	0
	0.52174	0	0
	0.23529	0	0.17391
	0.4	0.095238	0
	0.25	0.05	0
	0.5	0.16279	0.092593
	0.47368	0.061224	0
	0.61905	0.16667	0
	0.15385	0	0
	0.34783	0	0
	0.625	0	0
	0.14286	0.05618	0
	0.32	0.12162	0
	0.36	0	0
