# Supplementary material for: High-fidelity, efficient, and reversible labeling of endogenous proteins using CRISPR-based designer exon insertion
Source: eLife. 2021 Jun 8;10:e64911. doi: 10.7554/eLife.64911 (PMC8211447; doi:10.7554/eLife.64911)
Supplement: Figure 5—source data 1. [file elife-64911-fig5-data1.xlsx]

## Sheet: Fig5C
	mACTB	mCaMKIIa	mTUBA1B
	2.3383	0.80162	-1.3931
	2.1967	0.17443	-1.1741
	2.4591	0.81145	-1.0424
	2.3327	0.70577	-1.1805
	2.0605	0.89436	-0.99907
	2.1083	0.78023	-1.0669
	2.1687	0.69921	-0.96355
	2.2075	0.60033	-2.0297
	2.2719	0.92019	-2.3093
	2.311	0.81548	-1.3495
	2.2727	0.87492	-1.2117
	3.2383	0.56772	-1.7181
	2.6765	0.4926	-2.5855
	2.8491	0.16973	-2.1247
	2.4931	0.68884	-2.2723
	2.7137	0.77953	-2.3182
	2.4676	0.65213	-1.4231
	2.5319	0.47826	-2.2321
	2.5964	0.59549	-0.90441
	2.2953	0.52807	-0.55156
	2.364	0.79257	-0.69871
	2.3349	0.72753	-0.78538
	2.3494		-0.09877
	1.9571		-0.68915
	2.1691		-1.2194
	1.991		-1.2665
	2.1297
	2.1082
	1.9029
	2.5298
	2.2831
	2.0319
	2.1768
	1.7226
	1.9068
	1.7879
	1.6315
	1.6828
	1.6146
	1.4193
	1.625
	1.4661
	1.5607
	0.86909
	2.2234
	1.7951
	2.2105
	1.9092
	1.9741
	1.9202
	2.2042
	2.2884
	2.085
	1.9794
	2.0299

## Sheet: Fig5E
	mACTB	mTUBA1B
	0.45455	0.27586
	0.3	0.58333
	0.66667	0.17391
	0.27273	0.19231
	0.5	0.28571
	0.5	0.5
	0.6	0.16364
	0.31818	0.10909
	0.17949	0.4
	0.45833	0.28947
