# Supplementary material for: High-fidelity, efficient, and reversible labeling of endogenous proteins using CRISPR-based designer exon insertion
Source: eLife. 2021 Jun 8;10:e64911. doi: 10.7554/eLife.64911 (PMC8211447; doi:10.7554/eLife.64911)
Supplement: Figure 6—source data 1. [file elife-64911-fig6-data1.xlsx]

## Sheet: Fig6C
	DRS-1	ctrl
	0.63333	0.3
	0.81481	0
	0.95	0
	0.74194	0
	0.52941	0.076923
	0.76471	0
	1	0
	1	0
	0.6	0
	0.45455
	0.85714
